# Supplementary material for: Interferon-Stimulated Genes Are Involved in Cross-resistance to Radiotherapy in Tamoxifen-Resistant Breast Cancer
Source: Oxford University Press journal article supplement (doi:10.1158/1078-0432.ccr-17-2551), 2018-04-16
Supplement: 10780432ccr172551-sup-188676_2_supp_4672374_p6ppgg.docx [file 10780432ccr172551-sup-188676_2_supp_4672374_p6ppgg.docx]

**Supplementary Table 1**

**List of the 94 genes with increased expression levels in both MCF-7TAM and MCF-7RT**

For each gene, the fold increase in expression levels in MCF-7TAM and MCF-7RT compared to MCF-7WT is shown (based on normalized read counts). Moreover, the genes that are correlated in breast cancer patients and the relation of these genes to IFN signaling are indicated. The genes used for *in vitro* experiments are marked gray. NA = not assessed.


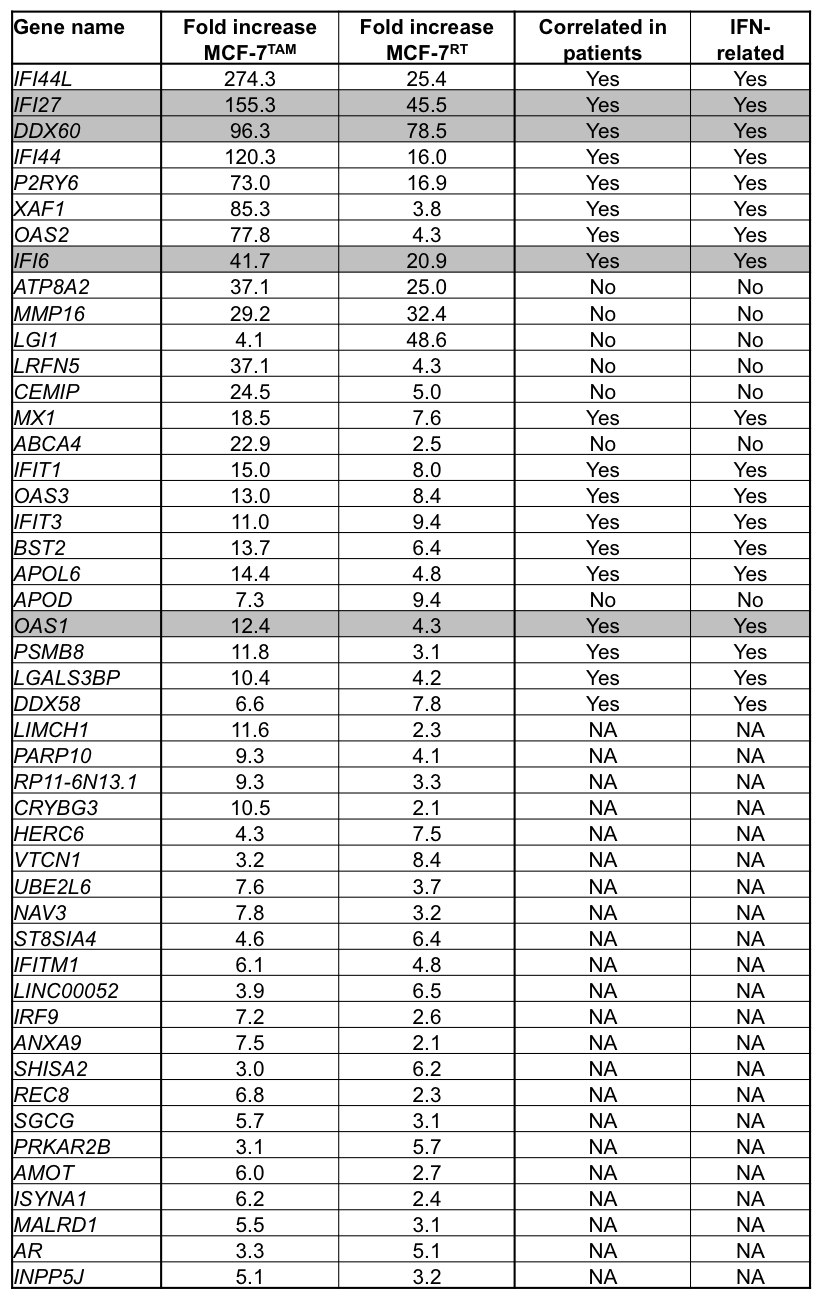


**
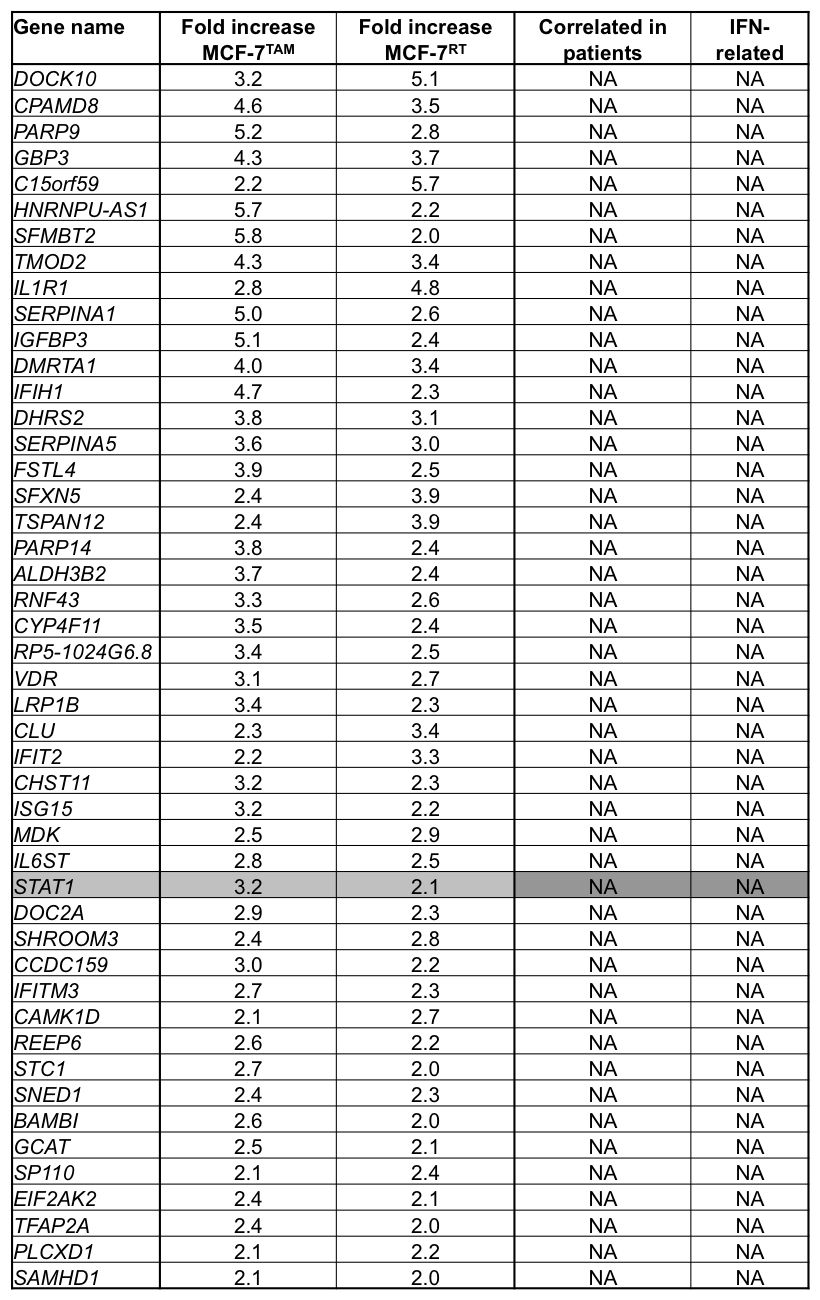
**
